# Supplementary material for: Diets with and without edible cricket support a similar level of diversity in the gut microbiome of dogs
Source: PeerJ. 2019 Sep 10;7:e7661. doi: 10.7717/peerj.7661 (PMC6743483; doi:10.7717/peerj.7661)
Supplement: Supplemental Information 2 [file peerj-07-7661-s002.xlsx]

## Sheet: Sheet1
Supplemental Table S1. Sex, age, weight, and weight change for all animals.
Dog ID	Sex	Age (years)	Initial weight (kg)	Final weight (kg)	Change in weight (kg)	Change in weight (%)
13150	M	8.37572	13.25	13.35	0.1	0.0075
13178	F	8.23334	8.94	9.15	0.21	0.0235
13193	F	8.21418	8.4	8.51	0.11	0.0131
13210	F	8.14025	5.91	6.51	0.6	0.1015
13237	F	7.84454	10.77	11.49	0.72	0.0669
13243	F	7.78978	7.99	7.81	-0.18	-0.0225
13279	M	7.47707	11.27	12.01	0.74	0.0657
13290	F	7.42779	7.09	7.52	0.43	0.0606
13293	M	7.42779	9.59	9.7	0.11	0.0115
13303	M	7.34839	12.6	13.61	1.01	0.0802
13324	F	7.19233	7.52	7.62	0.1	0.0133
13326	F	7.19233	7.62	7.31	-0.31	-0.0407
13370	M	7.0089	9.12	10.13	1.01	0.1107
13429	M	6.4607	11.69	12.1	0.41	0.0351
13434	F	6.44701	8.59	8.94	0.35	0.0407
13489	M	5.74071	11.58	11.26	-0.32	-0.0276
13490	M	5.74071	11.04	10.69	-0.35	-0.0317
13513	F	4.99772	9.89	9.43	-0.46	-0.0465
13518	M	4.99772	12.56	12.64	0.08	0.0064
13536	F	4.62529	11.69	11.62	-0.07	-0.006
13603	M	2.32117	8.7	9.28	0.58	0.0667
13621	M	1.77372	10.4	10.74	0.34	0.0327
13676	F	1.32055	7.88	7.67	-0.21	-0.0266
13691	F	1.16164	6.92	6.75	-0.17	-0.0246
13704	F	1.12329	8.08	8.17	0.09	0.0111
13706	F	1.12329	7.76	7.61	-0.15	-0.0193
13720	M	1.11781	9.9	11.08	1.18	0.1192
2377129	M	4.90187	12.01	12.88	0.87	0.0724
2399432	M	4.8115	11.91	12.72	0.81	0.068
2784123	M	3.47159	10.09	9.95	-0.14	-0.0139
2812178	F	3.38125	9.52	9.51	-0.01	-0.0011
2963028	M	2.88022	9.76	9.51	-0.25	-0.0256
