# Supplementary material for: Diets with and without edible cricket support a similar level of diversity in the gut microbiome of dogs
Source: PeerJ. 2019 Sep 10;7:e7661. doi: 10.7717/peerj.7661 (PMC6743483; doi:10.7717/peerj.7661)
Supplement: Supplemental Information 3 [file peerj-07-7661-s003.xlsx]

## Sheet: Sheet1
Supplemental Table S2. Nutritional analysis of diets by dry weight.
Diet	Moisture (% gross weight)	Dry matter (% gross weight)	Protein (crude, %)	Fat (acid hydrolysis, %)	Fiber (crude, %)	Ash (%)	Sulfur (total, %)	Phosphorus (total, %)	Potassium (total, %)	Magnesium (total, %)	Calcium (total, %)	Sodium (total, %)	Iron (total, ppm)	Manganese (total, ppm)	Copper (total, ppm)	Zinc (total, ppm)
0% Cricket	8.98	91.02	25.8	14.1	1.92	7.1	0.31	0.98	0.62	0.11	1.6	0.33	257	33	16.9	138
8% Cricket	8.92	91.08	26.2	14.2	2.44	6.91	0.3	1	0.66	0.11	1.6	0.33	256	34.2	19.4	142
16% Cricket	7.78	92.22	27.4	16	3.48	7.16	0.32	1.11	0.79	0.14	1.54	0.36	299	44.4	30.1	166
24% Cricket	7.39	92.61	26.7	14.7	3.86	6.87	0.29	1.04	0.77	0.13	1.56	0.32	284	44.5	29	158
