# Supplementary material for: Diets with and without edible cricket support a similar level of diversity in the gut microbiome of dogs
Source: PeerJ. 2019 Sep 10;7:e7661. doi: 10.7717/peerj.7661 (PMC6743483; doi:10.7717/peerj.7661)
Supplement: Supplemental Information 4 [file peerj-07-7661-s004.xlsx]

## Sheet: Sheet1
Supplemental Table S3. Metadata, read counts, and observed ASVs for all samples.
Dog ID	Sampling Day	Diet	Reads	Observed ASVs
13150	Day 0	24% Cricket	48337	81
13150	Day 14	24% Cricket	71626	83
13150	Day 29	24% Cricket	80653	77
13178	Day 0	0% Cricket	69245	86
13178	Day 14	0% Cricket	81745	95
13178	Day 29	0% Cricket	139682	100
13193	Day 0	16% Cricket	58079	99
13193	Day 14	16% Cricket	89349	104
13193	Day 29	16% Cricket	68756	86
13210	Day 0	8% Cricket	37165	74
13210	Day 14	8% Cricket	60035	96
13210	Day 29	8% Cricket	113345	134
13237	Day 0	0% Cricket	51347	100
13237	Day 14	0% Cricket	63548	104
13237	Day 29	0% Cricket	65274	115
13243	Day 0	24% Cricket	38298	97
13243	Day 14	24% Cricket	58147	116
13243	Day 29	24% Cricket	60413	110
13279	Day 0	16% Cricket	71256	79
13279	Day 14	16% Cricket	70202	102
13279	Day 29	16% Cricket	64247	85
13290	Day 0	16% Cricket	78704	98
13290	Day 14	16% Cricket	67524	89
13290	Day 29	16% Cricket	75260	87
13293	Day 0	8% Cricket	91813	93
13293	Day 14	8% Cricket	83940	106
13293	Day 29	8% Cricket	110570	127
13303	Day 0	0% Cricket	46460	105
13303	Day 14	0% Cricket	36846	96
13303	Day 29	0% Cricket	93384	100
13324	Day 0	0% Cricket	98540	107
13324	Day 14	0% Cricket	32191	66
13324	Day 29	0% Cricket	54437	82
13326	Day 0	8% Cricket	64723	101
13326	Day 14	8% Cricket	63850	70
13326	Day 29	8% Cricket	84442	90
13370	Day 0	24% Cricket	51287	70
13370	Day 14	24% Cricket	59279	69
13370	Day 29	24% Cricket	72211	67
13429	Day 0	16% Cricket	66505	88
13429	Day 14	16% Cricket	62491	83
13429	Day 29	16% Cricket	81859	93
13434	Day 0	24% Cricket	70504	76
13434	Day 14	24% Cricket	83555	83
13434	Day 29	24% Cricket	87403	74
13489	Day 0	8% Cricket	68498	79
13489	Day 14	8% Cricket	82378	85
13489	Day 29	8% Cricket	81250	86
13490	Day 0	0% Cricket	56427	81
13490	Day 14	0% Cricket	83330	91
13490	Day 29	0% Cricket	69368	88
13513	Day 0	16% Cricket	57202	76
13513	Day 14	16% Cricket	85443	84
13513	Day 29	16% Cricket	58578	77
13518	Day 0	24% Cricket	55396	74
13518	Day 14	24% Cricket	78397	77
13518	Day 29	24% Cricket	98025	68
13536	Day 0	8% Cricket	58000	66
13536	Day 14	8% Cricket	79693	88
13536	Day 29	8% Cricket	85459	93
13603	Day 0	16% Cricket	51622	98
13603	Day 14	16% Cricket	58518	85
13603	Day 29	16% Cricket	73615	98
13621	Day 0	8% Cricket	94150	122
13621	Day 14	8% Cricket	53600	88
13621	Day 29	8% Cricket	87471	122
13676	Day 0	24% Cricket	96154	130
13676	Day 14	24% Cricket	55862	110
13676	Day 29	24% Cricket	78056	126
13691	Day 0	16% Cricket	30425	95
13691	Day 14	16% Cricket	41642	95
13691	Day 29	16% Cricket	41176	106
13704	Day 0	8% Cricket	44294	106
13704	Day 14	8% Cricket	64394	81
13704	Day 29	8% Cricket	65322	108
13706	Day 0	0% Cricket	50929	103
13706	Day 14	0% Cricket	41748	80
13706	Day 29	0% Cricket	48585	100
13720	Day 0	0% Cricket	86417	107
13720	Day 14	0% Cricket	69947	110
13720	Day 29	0% Cricket	77364	113
2377129	Day 0	16% Cricket	60451	88
2377129	Day 14	16% Cricket	82310	97
2377129	Day 29	16% Cricket	49356	89
2399432	Day 0	8% Cricket	27683	90
2399432	Day 14	8% Cricket	49486	100
2399432	Day 29	8% Cricket	62314	107
2784123	Day 0	0% Cricket	45742	72
2784123	Day 14	0% Cricket	51860	84
2784123	Day 29	0% Cricket	44892	90
2812178	Day 0	24% Cricket	30483	70
2812178	Day 14	24% Cricket	77866	90
2812178	Day 29	24% Cricket	90853	100
2963028	Day 0	24% Cricket	26679	90
2963028	Day 14	24% Cricket	48472	103
2963028	Day 29	24% Cricket	55936	112
