# Supplementary material for: Diets with and without edible cricket support a similar level of diversity in the gut microbiome of dogs
Source: PeerJ. 2019 Sep 10;7:e7661. doi: 10.7717/peerj.7661 (PMC6743483; doi:10.7717/peerj.7661)
Supplement: Supplemental Information 6 [file peerj-07-7661-s006.xlsx]

## Sheet: Sheet1
Supplemental Table S5: Linear mixed-effects model results for alpha and beta diversity metrics
Metric	Model	Variable or parameter	Estimate	SE	Z-score	P value
Shannon diversity	Fixed effects	Intercept	4.764	0.094	50.844	0
		Cricket protein [T.16Cricket]	0.066	0.133	0.494	0.621
		Cricket protein [T.24Cricket]	-0.01	0.133	-0.073	0.942
		Cricket protein [T.8Cricket]	-0.181	0.133	-1.366	0.172
		Day	0.005	0.004	1.288	0.198
		Day:Cricket protein [T.16Cricket]	-0.003	0.005	-0.529	0.597
		Day:Cricket protein [T.24Cricket]	0	0.005	-0.049	0.961
		Day:Cricket protein [T.8Cricket]	0.01	0.005	1.81	0.07
	Random effects	Intercept (Dog ID)	0.031	0.07
Pielou's evenness	Fixed effects	Intercept	0.731	0.011	68.627	0
		Cricket protein [T.16Cricket]	0.011	0.015	0.723	0.47
		Cricket protein [T.24Cricket]	0.01	0.015	0.669	0.503
		Cricket protein [T.8Cricket]	-0.019	0.015	-1.24	0.215
		Day	0.001	0	1.064	0.288
		Day:Cricket protein [T.16Cricket]	0	0.001	-0.225	0.822
		Day:Cricket protein [T.24Cricket]	0	0.001	-0.176	0.86
		Day:Cricket protein [T.8Cricket]	0.001	0.001	1.056	0.291
	Random effects	Intercept (Dog ID)	0	0.006
Richness (observed ASVs)	Fixed effects	Intercept	92.457	5.119	18.062	0
		Cricket protein [T.16Cricket]	-1.024	7.259	-0.141	0.888
		Cricket protein [T.24Cricket]	-5.581	7.239	-0.771	0.441
		Cricket protein [T.8Cricket]	-4.85	7.239	-0.67	0.503
		Day	0.125	0.184	0.681	0.496
		Day:Cricket protein [T.16Cricket]	-0.145	0.26	-0.559	0.576
		Day:Cricket protein [T.24Cricket]	0.058	0.26	0.223	0.824
		Day:Cricket protein [T.8Cricket]	0.443	0.26	1.705	0.088
	Random effects	Intercept (Dog ID)	116.261	4.692
Bray-Curtis dissimilarity (distances between day 0 and day 29)	Fixed effects	Intercept	0.424	0.056	7.572	0
		Cricket protein [T.16Cricket]	0.088	0.082	1.073	0.283
		Cricket protein [T.24Cricket]	-0.05	0.079	-0.625	0.532
		Cricket protein [T.8Cricket]	0.021	0.079	0.265	0.791
		Day	0.002	0.002	0.687	0.492
		Day:Cricket protein [T.16Cricket]	-0.005	0.003	-1.463	0.143
		Day:Cricket protein [T.24Cricket]	0.001	0.003	0.284	0.777
		Day:Cricket protein [T.8Cricket]	-0.002	0.003	-0.609	0.542
	Random effects	Intercept (Dog ID)	0.003	0.03
