# Supplementary material for: Diets with and without edible cricket support a similar level of diversity in the gut microbiome of dogs
Source: PeerJ. 2019 Sep 10;7:e7661. doi: 10.7717/peerj.7661 (PMC6743483; doi:10.7717/peerj.7661)
Supplement: Supplemental Information 8 [file peerj-07-7661-s008.xlsx]

## Sheet: Sheet1
Supplemental Table S7: Linear mixed-effects model results for ASVs with significant interactions between time and diet, identified with feature-volatility approach
P-values in bold are considered statistically significant.
ASV ID	Taxonomy	Model	Variable or parameter	Estimate	SE	Z-score	P value
1541faf3a457cc8cc05b01ce30983449	Bacteria;Firmicutes;Erysipelotrichia;Erysipelotrichales;Erysipelotrichaceae;Catenibacterium;uncultured bacterium ("sp. 1")	Fixed effects	Intercept	0.002	0.001	1.669	0.095
			Cricket protein [T.16Cricket]	0.001	0.002	0.794	0.427
			Cricket protein [T.24Cricket]	-0.002	0.002	-1.05	0.294
			Cricket protein [T.8Cricket]	0.001	0.002	0.322	0.748
			Day	0	0	0.378	0.705
			Day:Cricket protein [T.16Cricket]	0	0	1.371	0.17
			Day:Cricket protein [T.24Cricket]	0	0	4.769	0
			Day:Cricket protein [T.8Cricket]	0	0	0.303	0.762
		Random effects	Intercept (Dog ID)	0	0.001
8e83238a1a628f1db6f17d9e5524714f	Bacteria;Firmicutes;Erysipelotrichia;Erysipelotrichales;Erysipelotrichaceae;Catenibacterium;uncultured bacterium ("sp. 2")	Fixed effects	Intercept	0.001	0.001	1.459	0.144
			Cricket protein [T.16Cricket]	0.001	0.001	0.372	0.71
			Cricket protein [T.24Cricket]	-0.002	0.001	-1.466	0.143
			Cricket protein [T.8Cricket]	0	0.001	-0.081	0.936
			Day	0	0	0.529	0.597
			Day:Cricket protein [T.16Cricket]	0	0	0.926	0.354
			Day:Cricket protein [T.24Cricket]	0	0	4.427	0
			Day:Cricket protein [T.8Cricket]	0	0	0.345	0.73
		Random effects	Intercept (Dog ID)	0	0
12615dfed222d35c1582cbd6cef48013	Bacteria;Firmicutes;Clostridia;Clostridiales;Lachnospiraceae;[Ruminococcus] torques group;NA	Fixed effects	Intercept	0	0	1.104	0.27
			Cricket protein [T.16Cricket]	0	0.001	0.592	0.554
			Cricket protein [T.24Cricket]	0	0.001	0.318	0.751
			Cricket protein [T.8Cricket]	0.001	0.001	1.609	0.108
			Day	0	0	4.076	0
			Day:Cricket protein [T.16Cricket]	0	0	-1.801	0.072
			Day:Cricket protein [T.24Cricket]	0	0	-2.307	0.021
			Day:Cricket protein [T.8Cricket]	0	0	-2.018	0.044
		Random effects	Intercept (Dog ID)	0	0
2a7169b7465789a82b4f47c3d934d259	Bacteria;Firmicutes;Clostridia;Clostridiales;Lachnospiraceae;Blautia;NA	Fixed effects	Intercept	0.004	0.001	3.464	0.001
			Cricket protein [T.16Cricket]	0.002	0.002	1.368	0.171
			Cricket protein [T.24Cricket]	0.001	0.002	0.727	0.467
			Cricket protein [T.8Cricket]	0.003	0.002	1.636	0.102
			Day	0	0	1.526	0.127
			Day:Cricket protein [T.16Cricket]	0	0	-1.802	0.072
			Day:Cricket protein [T.24Cricket]	0	0	-1.347	0.178
			Day:Cricket protein [T.8Cricket]	0	0	-2.161	0.031
		Random effects	Intercept (Dog ID)	0	0
